# Supplementary material for: The Effects of 10 Hz and 20 Hz tACS in Network Integration and Segregation in Chronic Stroke: A Graph Theoretical fMRI Study
Source: PubMed Central journal article supplement (PMC8002277; doi:10.3390/brainsci11030377), 2021-03-16
Supplement: brainsci-11-00377-s001.pdf [file brainsci-11-00377-s001.pdf]

# Supplementary Materials: The effects of 10Hz and 20Hz tACS in network integration and segregation in chronic stroke: A graph theoretical fMRI study

Cheng Chen, Kai Yuan, Winnie Chiu-wing Chu and Raymond Kai-yu Tong

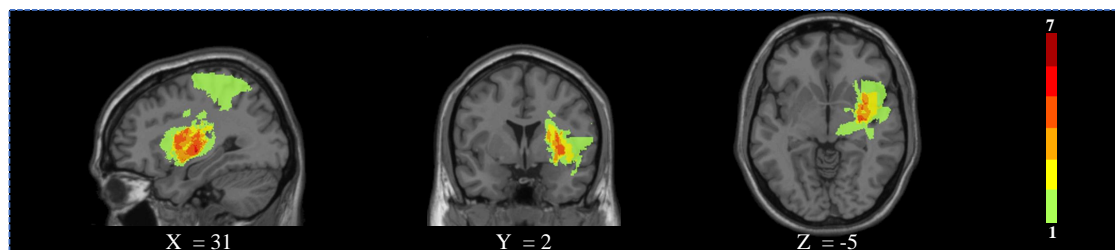

**Figure S1.** Lesion distribution of stroke subjects. The color bar represents the number of patients with lesions in the corresponding areas. The annotation of X, Y, Z represented the coordinate of the slice in MNI space. In second and third plots, left orientation represents left side of the brain.

**Table S1.** Demographics and clinical properties of the participants.

| Subject  | Gender | Age   | Stroke onset (y) | Stroke type | Lesion side | FMA   | ARAT  |
|----------|--------|-------|------------------|-------------|-------------|-------|-------|
| S1       | Male   | 65-69 | 0.7              | Ischemic    | Left        | 4     | 0     |
| S2       | Male   | 50-54 | 3                | Ischemic    | Right       | 15    | 11    |
| S3       | Female | 65-69 | 2                | Ischemic    | Left        | 17    | 0     |
| S4       | Male   | 50-54 | 1                | Ischemic    | Left        | 32    | 6     |
| S5       | Female | 70-74 | 9                | Ischemic    | Left        | 22    | 17    |
| S6       | Male   | 55-59 | 3                | Ischemic    | Left        | 55    | 57    |
| S7       | Female | 60-64 | 3                | Ischemic    | Left        | 47    | 53    |
| S8       | Male   | 55-59 | 4                | Ischemic    | Right       | 49    | 54    |
| S9       | Male   | 55-59 | 4                | Ischemic    | Right       | 27    | 23    |
| S10      | Female | 70-74 | 1                | Ischemic    | Right       | 8     | 9     |
| S11      | Female | 70-74 | 6                | Ischemic    | Right       | 45    | 51    |
| S12      | Male   | 60-64 | 3                | Hemorrhage  | Right       | 24    | 22    |
| S13      | Male   | 35-39 | 3                | Hemorrhage  | Right       | 27    | 8     |
| mean±std |        | 61±10 |                  |             |             | 29±16 | 24±21 |

Abbreviations: FMA = Fugel-Meyer Assessment for upper limb; ARAT = Action Research Arm Test.

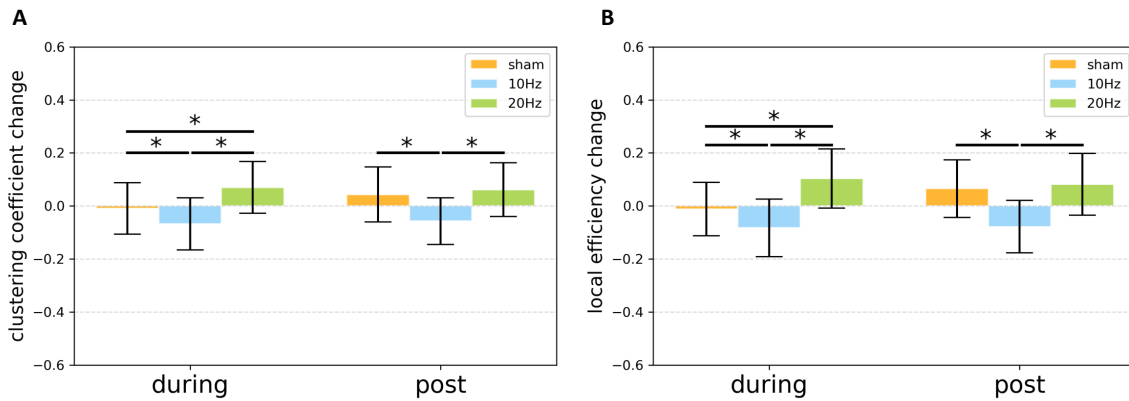

**Figure S2.** The bar chart of (A) clustering coefficient change and (B) local efficiency change of the network at the whole-brain level for various conditions during and after stimulation. Error bar stands for the standard error. Asterisk (\*) indicates that a significant difference was observed at  $p < 0.05$ .

### Clustering coefficient and local efficiency analysis at the whole-brain level

For clustering coefficient change at the whole-brain level, the repeated measure ANOVA showed significant *stimulation – time* interaction effect ( $F(2, 230)=13.025, p < 0.001$ ). During stimulation, *Post – hoc* tests indicated a significant difference between *sham* and 10Hz, *sham* and 20Hz, as well as 10Hz and 20Hz (all  $p < 0.001$ , Bonferroni corrected). After stimulation, *Post – hoc* tests indicated a significant difference between *sham* and 10Hz as well as 10Hz and 20Hz (both  $p < 0.001$ , Bonferroni corrected) (Figure S2A). Similarly, for local efficiency change at the whole-brain level, the repeated measure ANOVA showed significant *stimulation – time* interaction effect ( $F(2, 230)=30.285, p < 0.001$ ). During stimulation, *Post – hoc* tests indicated a significant difference between *sham* and 10Hz, *sham* and 20Hz, as well as 10Hz and 20Hz (all  $p < 0.001$ , Bonferroni corrected). After stimulation, *Post – hoc* tests indicated a significant difference between *sham* and 10Hz as well as 10Hz and 20Hz (both  $p < 0.001$ , Bonferroni corrected) (Figure S2B). These results also illustrated the heterogeneous modulation effects of 10Hz and 20Hz tACS. Interestingly, it could be observed that both 10Hz and 20Hz tACS showed a slightly different modulation behaviour between in motor-related regions and at the whole-brain level, compared with the results of corresponding analysis in motor-related regions (Figure 6). This phenomenon could also be found in network integration and segregation properties, which implied that the modulation effect of a specific stimulation might be different if observed from different networks.

**Table S2.** AAL ROIs in motor-related regions.

| Index | L (R) side | abbreviation      | MNI coordinates |     |    |
|-------|------------|-------------------|-----------------|-----|----|
|       |            |                   | X               | Y   | Z  |
| 1     | L          | Precentral_L      | -39             | -6  | 51 |
| 2     | R          | Precentral_R      | 41              | -8  | 52 |
| 3     | L          | Frontal_Sup_L     | -18             | 35  | 42 |
| 4     | R          | Frontal_Sup_R     | 22              | 31  | 44 |
| 19    | L          | Supp_Motor_Area_L | -5              | 5   | 61 |
| 20    | R          | Supp_Motor_Area_R | 9               | 0   | 62 |
| 31    | L          | Cingulum_Ant_L    | -4              | 35  | 14 |
| 32    | R          | Cingulum_Ant_R    | 8               | 37  | 16 |
| 43    | L          | Calcarine_L       | -7              | -79 | 6  |
| 44    | R          | Calcarine_R       | 16              | -73 | 9  |
| 57    | L          | Postcentral_L     | -42             | -23 | 49 |
| 58    | R          | Postcentral_R     | 41              | -25 | 53 |
| 59    | L          | Parietal_Sup_L    | -23             | -60 | 59 |
| 60    | R          | Parietal_Sup_R    | 26              | -59 | 62 |
| 73    | L          | Putamen_L         | -24             | 4   | 2  |
| 74    | R          | Putamen_R         | 28              | 5   | 2  |
| 75    | L          | Pallidum_L        | -18             | 0   | 0  |
| 76    | R          | Pallidum_R        | 21              | 0   | 0  |
| 77    | L          | Thalamus_L        | -11             | -18 | 8  |
| 78    | R          | Thalamus_R        | 13              | -18 | 8  |
